# Supplementary material for: Improving molecular machine learning through adaptive subsampling with active learning
Source: Royal Society of Chemistry journal article supplement (doi:10.1039/d3dd00037k), 2023-01-01
Supplement: d3dd00037k1.pdf [file d3dd00037k1.pdf]

## Supporting Information

### Improving Molecular Machine Learning Through Adaptive Subsampling with Active Learning

Yujing Wen<sup>a</sup>, Zhixiong Li<sup>a</sup>, Yan Xiang<sup>a</sup>, Daniel Reker<sup>\*a</sup>

<sup>a</sup>*Department of Biomedical Engineering, Duke University, Durham, North Carolina 27705,  
United States*

#### AUTHOR INFORMATION

\* Corresponding Author

E-mail address: [daniel.reker@duke.edu](mailto:daniel.reker@duke.edu)

**Table S1.** Percentage increase of different performance metrics when using active learning-based subsampling relative to training models on the full dataset.

| Dataset | Percentage increase in MCC | Percentage increase in F1 | Percentage increase in ACC | Percentage increase in BAS |
|---------|----------------------------|---------------------------|----------------------------|----------------------------|
| BBBP    | 4.25%                      | 0.40%                     | 0.90%                      | 3.40%                      |
| BACE    | 5.07%                      | 3.71%                     | 1.29%                      | 2.19%                      |
| Clintox | 129%                       | 139%                      | 2.72%                      | 3.01%                      |
| HIV     | 5.52%                      | 6.01%                     | 0.55%                      | 0.93%                      |

**Table S2.** Class balance in the active learning-based dataset compared to the original class imbalance.

| Dataset | Imbalance (% positive data) |                           |
|---------|-----------------------------|---------------------------|
|         | Full dataset                | maxIter set $T_{n_{max}}$ |
| BBBP    | 77.92%                      | 58.38%                    |
| BACE    | 53.04%                      | 51.57%                    |
| ClinTox | 7.03%                       | 29.68%                    |
| HIV     | 3.81%                       | 21.22%                    |

**Table S3:** Number of unique molecules selected by the 20 active learning runs.

| Dataset | Number of unique molecules selected     |                                              | Total number of training data molecules |
|---------|-----------------------------------------|----------------------------------------------|-----------------------------------------|
|         | in every of the 20 active learning runs | at least once during 20 active learning runs |                                         |
| BBBP    | 70                                      | 700                                          | 1019                                    |
| BACE    | 224                                     | 702                                          | 756                                     |
| Clintox | 14                                      | 342                                          | 739                                     |
| HIV     | 647                                     | 6784                                         | 20563                                   |

**Table S4:** Performance of sampling methods on datasets without error introduction. Performance is shown as percentage of maximum performance achieved per dataset. The last column shows the median performance of a method across all datasets. The best performing method per column (i.e., per dataset or across all datasets as measured by median) is highlighted in bold.

|                                 | BBBP        | BACE        | Clintox     | HIV         | B. Cancer   | Median      |
|---------------------------------|-------------|-------------|-------------|-------------|-------------|-------------|
| Full model                      | 0.96        | 0.95        | 0.29        | 0.85        | 0.97        | 0.95        |
| AllKNN                          | 0.98        | 0.90        | 0.81        | 0.94        | 0.96        | 0.95        |
| ClusterCentroids                | 0.78        | 0.98        | 0.35        | -0.02       | 0.98        | 0.94        |
| CondensedNearestNeighbour       | 0.58        | 0.71        | 0.89        | 0.98        | 0.93        | 0.78        |
| EditedNearestNeighbours         | 0.97        | 0.78        | 0.72        | 0.96        | 0.96        | 0.89        |
| InstanceHardnessThreshold       | 0.78        | 0.90        | 0.66        | <b>1.00</b> | 0.87        | 0.96        |
| NearMiss                        | 0.30        | 0.78        | 0.10        | 0.10        | 0.97        | 0.87        |
| NeighbourhoodCleaningRule       | 0.99        | 0.88        | 0.72        | 0.96        | 0.96        | 0.30        |
| OneSidedSelection               | 0.96        | 0.95        | 0.34        | 0.91        | 0.95        | 0.96        |
| RandomUnderSampler              | 0.92        | 0.95        | 0.70        | 0.52        | <b>1.00</b> | 0.95        |
| RepeatedEditedNearestNeighbours | 0.96        | 0.78        | 0.74        | 0.94        | 0.92        | 0.92        |
| RandomOverSampler               | 0.97        | 0.95        | <b>1.00</b> | 0.96        | 0.94        | 0.95        |
| SMOTEN                          | 0.93        | 0.97        | 0.30        | 0.74        | 0.95        | 0.95        |
| Balanced                        | 0.87        | 0.89        | 0.61        | 0.61        | 0.92        | 0.96        |
| Diverse                         | 0.90        | 1.00        | 0.20        | 0.14        | NA          | 0.87        |
| Balanced-Diverse                | 0.82        | 0.93        | 0.45        | 0.44        | NA          | 0.55        |
| Diverse-Balanced                | 0.85        | 0.99        | 0.47        | 0.44        | NA          | 0.64        |
| Active Learning                 | <b>1.00</b> | <b>1.00</b> | 0.67        | 0.90        | 0.98        | <b>0.98</b> |

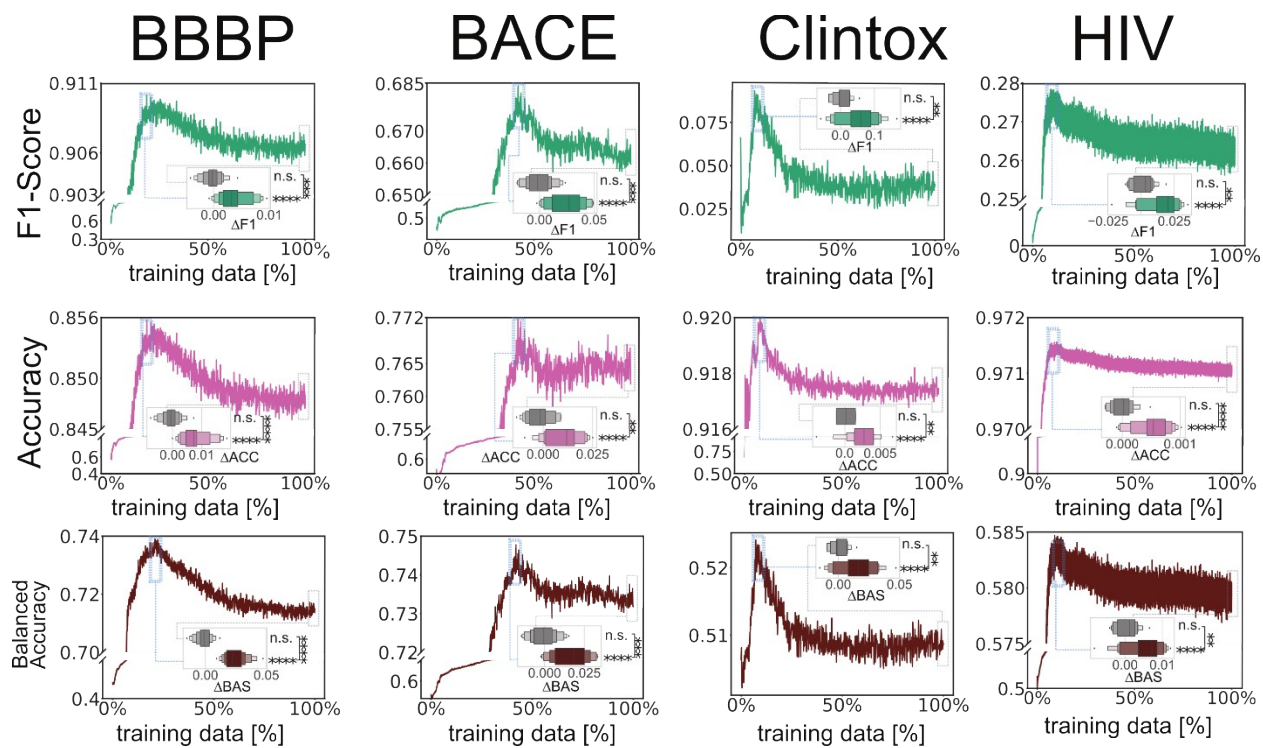

**Figure S1.** Evaluation of active learning subsampling using other evaluation metrics: F1 score, accuracy, and balanced accuracy.

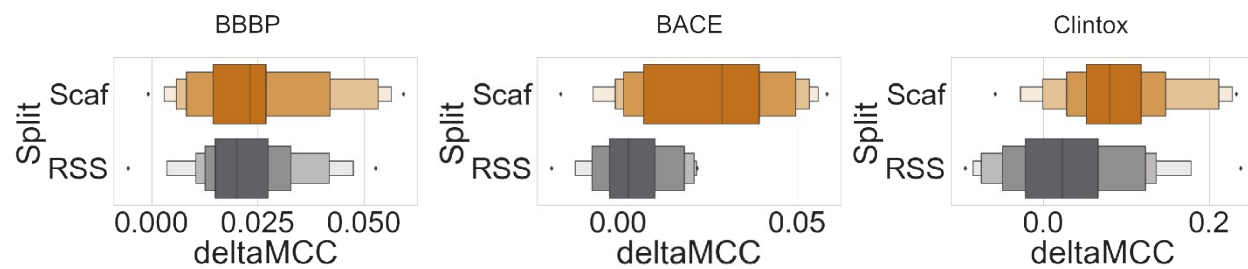

**Figure S2.** Improvements in performance for active learning-based subsampling when using scaffold-based train-test splits (“scaf”) compared to random stratified splits (“RSS”).
